# Supplementary material
Source: PubMed Central journal article supplement (PMC6736071)
Supplement: nxz092_supplemental_file.pdf [file nxz092_supplemental_file.pdf]

Supplemental Table 1. Composition of Western and Mediterranean experimental diets<sup>1,2</sup>

| Western diet                                                   |             | Mediterranean diet                                             |             |
|----------------------------------------------------------------|-------------|----------------------------------------------------------------|-------------|
| Ingredient                                                     | g/kg        | Ingredient                                                     | g/kg        |
| Casein, USP                                                    | 85.0        | Casein, USP                                                    | 17.4        |
| Whey protein – 895                                             | 85.0        | Whey protein – 895                                             | 17.4        |
|                                                                |             | Dried egg white                                                | 26.1        |
|                                                                |             | Fishmeal (Menhaden)                                            | 26.1        |
|                                                                |             | Walnuts                                                        | 8.7         |
|                                                                |             | Black bean flour                                               | 43.5        |
|                                                                |             | Garbanzo bean flour                                            | 17.4        |
|                                                                |             | Wheat flour (all purpose)                                      | 243.5       |
| Dextrin                                                        | 260.0       | Dextrin                                                        | 96.6        |
| Sucrose                                                        | 180.0       | Sucrose                                                        | 34.8        |
| High fructose corn syrup 55                                    | 70.0        | Banana                                                         | 130.4       |
|                                                                |             | Applesauce                                                     | 38.2        |
|                                                                |             | Tomato paste                                                   | 17.4        |
| Cellulose (Alphacel) <sup>1</sup>                              | 79.4        | Cellulose (Alphacel) <sup>1</sup>                              | 94.8        |
| Lard                                                           | 41.5        | Olive oil (Filippo Berio Extra Virgin)                         | 61.7        |
| Beef tallow                                                    | 40.0        | Menhaden oil (Omegapure)                                       | 8.7         |
| Butter, lightly salted                                         | 12.5        | Butter, lightly salted                                         | 8.7         |
| Corn oil                                                       | 35.0        | Corn oil                                                       | 10.4        |
| Flaxseed oil                                                   | 3.0         | Flaxseed oil                                                   | 1.7         |
| Dried egg yolk                                                 | 6.0         | Dried egg yolk                                                 | 14.8        |
| Crystalline cholesterol                                        | 0.4         |                                                                |             |
| Complete vitamin mix <sup>3</sup> (Teklad 85529)               | 25.0        | Complete vitamin mix <sup>3</sup> (Teklad 85529)               | 21.7        |
| Mineral mix <sup>4</sup> (without Ca, P, NaCl) (Teklad 140306) | 50.0        | Mineral mix <sup>4</sup> (without Ca, P, NaCl) (Teklad 140306) | 43.5        |
| Calcium carbonate                                              | 4.3         | Calcium carbonate                                              | 3.7         |
| Calcium phosphate, monobasic                                   | 7.5         | Calcium phosphate, monobasic                                   | 6.5         |
| NaCl (table salt)                                              | 16.0        | NaCl (table salt)                                              | 6.3         |
| <b>Total</b>                                                   | <b>1000</b> | <b>Total</b>                                                   | <b>1000</b> |

<sup>1</sup>Total Fiber (% of diet): Western: 7.94, Mediterranean: 12.7

<sup>2</sup>Caloric density of diets: Western: 3.42 kcal/g, Mediterranean: 2.64 kcal/g

<sup>3</sup>Vitamin mix composition: Vitamin A palmitate (500,000 IU/g) (1.8 g/kg), vitamin E DL-alpha tocopheryl acetate (2.5 g/kg), inositol (5.0 g/kg), riboflavin (1.0 g/kg), vitamin K MSB complex (2.3 g/kg), p-aminobenzoic acid (5.0 g/kg), niacin (4.5 g/kg), pyridoxine HCl (1.0 g/kg), thiamin (81%) (1.0 g/kg), calcium pantothenate (3.0 g/kg), vitamin B12 (0.1% in mannitol) (1.4 g/kg), biotin (0.02 g/kg), folic acid (0.1 g/kg), vitamin C, ascorbic acid, coated (97.5%) (90.0 g/kg), choline chloride (75.0 g/kg), vitamin D3, cholecalciferol (500,000 IU/g) (0.2 g/kg), dextrose monohydrate (806.3 g/kg)

<sup>4</sup>Mineral mix composition: Potassium carbonate (313.9 g/kg), magnesium sulfate heptahydrate (143.9 g/kg), dried ferrous sulfate (7.9 g/kg), manganese sulfate monohydrate (1.4 g/kg), zinc chloride (0.9 g/kg), cupric sulfate (0.3 g/kg), potassium iodide (0.08 g/kg), chromium acetate hydroxide (0.05 g/kg), sodium fluoride (0.02 g/kg), sodium selenite pentahydrate (0.004 g/kg), dextrin (531.6 g/kg)

Supplementary Data

**Supplemental Table 2. Macronutrient composition of Western and Mediterranean experimental diets**

|                            | <b>Western</b> | <b>Mediterranean</b> |
|----------------------------|----------------|----------------------|
| <b>% of Total Calories</b> |                |                      |
| Protein                    | 16             | 16                   |
| Carbohydrate               | 54             | 54                   |
| Fat                        | 31             | 31                   |
|                            |                |                      |
| <b>% of Total Fats</b>     |                |                      |
| Saturated                  | 36             | 21                   |
| Monounsaturated            | 36             | 57                   |
| Polyunsaturated            | 26             | 20                   |

**Supplemental Table 3. Summary of respiration measurements in each SUIT protocol**

| <b>Respiration Measurement</b>           | <b>Description</b>                                                  | <b>Measurement recorded after additions of:</b>                          |
|------------------------------------------|---------------------------------------------------------------------|--------------------------------------------------------------------------|
| <b>SUIT protocol with fatty acids</b>    |                                                                     |                                                                          |
| FAO                                      | Respiration mediated by fatty acid oxidation                        | octanoylcarnitine and malate                                             |
| FAO + Complex I                          | Respiration mediated by fatty acid oxidation and complex I          | octanoylcarnitine, malate, pyruvate, and glutamate                       |
| FAO + Complex I + II                     | Respiration mediated by fatty acid oxidation and complexes I and II | octanoylcarnitine, malate, pyruvate, glutamate, and succinate            |
| FAO Max ETS Capacity                     | Maximum electron transport system capacity / maximum respiration    | FCCP (titrations until maximum)                                          |
| FAO ETS Rot Sensitive                    | Respiration sensitive to inhibition of complex I by rotenone        | obtained by subtracting respiration after rotenone from max ETS capacity |
| FAO ETS Rot Insensitive                  | Respiration insensitive to inhibition of complex I by rotenone      | rotenone                                                                 |
| <b>SUIT protocol without fatty acids</b> |                                                                     |                                                                          |
| Complex I                                | Respiration mediated by complex I                                   | pyruvate, malate, and glutamate                                          |
| Complex I + II                           | Respiration mediated by complexes I and II                          | pyruvate, malate, glutamate, and succinate                               |
| Max ETS Capacity                         | Maximum electron transport system capacity / maximum respiration    | FCCP (titrations until maximum)                                          |
| ETS Rot Sensitive                        | Respiration sensitive to inhibition of complex I by rotenone        | obtained by subtracting respiration after rotenone from max ETS capacity |
| ETS Rot Insensitive                      | Respiration insensitive to inhibition of complex I by rotenone      | rotenone                                                                 |

Supplementary Data

**Supplemental Table 4. Bioenergetic characteristics of female cynomolgus macaques fed either a Western or Mediterranean diet<sup>1</sup>**

|                                                                                                                                                                                                                                                                                                                                                                                                                                             | Western Diet Group        | Mediterranean Diet Group  | <i>P</i> -value |
|---------------------------------------------------------------------------------------------------------------------------------------------------------------------------------------------------------------------------------------------------------------------------------------------------------------------------------------------------------------------------------------------------------------------------------------------|---------------------------|---------------------------|-----------------|
| <b>Respirometry of Permeabilized Muscle Fibers</b><br><b><i>O<sub>2</sub> Flux ( pmol · s<sup>-1</sup> · mg tissue<sup>-1</sup>)</i></b>                                                                                                                                                                                                                                                                                                    |                           |                           |                 |
| FAO                                                                                                                                                                                                                                                                                                                                                                                                                                         | 5.4 ± 0.7 (2.9 – 10.0)    | 3.5 ± 0.6 (0.9 – 6.8)     | 0.05*           |
| FAO + Complex I                                                                                                                                                                                                                                                                                                                                                                                                                             | 14.8 ± 2.2 (8.6 – 31.7)   | 9.7 ± 1.0 (4.4 – 15.5)    | 0.05*           |
| FAO + Complex I + Complex II                                                                                                                                                                                                                                                                                                                                                                                                                | 18.0 ± 2.2 (10.2 – 32.2)  | 13.4 ± 1.4 (6.6 – 19.8)   | 0.10            |
| FAO Max ETS Capacity                                                                                                                                                                                                                                                                                                                                                                                                                        | 20.1 ± 2.3 (11.6 – 34.9)  | 16.3 ± 1.2 (10.4 – 21.4)  | 0.16            |
| FAO ETS Rotenone Sensitive                                                                                                                                                                                                                                                                                                                                                                                                                  | 7.9 ± 1.2 (3.4 – 16.2)    | 6.0 ± 1.3 (3.2 – 16.4)    | 0.28            |
| FAO ETS Rotenone Insensitive                                                                                                                                                                                                                                                                                                                                                                                                                | 12.2 ± 1.2 (7.6 – 18.7)   | 10.3 ± 1.1 (5.0 – 15.5)   | 0.26            |
| Complex I                                                                                                                                                                                                                                                                                                                                                                                                                                   | 11.3 ± 0.9 (7.2 – 16.4)   | 8.7 ± 0.9 (4.2 – 12.0)    | 0.06            |
| Complex I + Complex II                                                                                                                                                                                                                                                                                                                                                                                                                      | 15.1 ± 1.0 (10.0 – 20.5)  | 11.6 ± 1.1 (5.9 – 15.3)   | 0.03*           |
| Max ETS Capacity                                                                                                                                                                                                                                                                                                                                                                                                                            | 23.7 ± 1.8 (16.3 – 33.0)  | 18.2 ± 1.7 (10.3 – 26.7)  | 0.03*           |
| ETS Rotenone Sensitive                                                                                                                                                                                                                                                                                                                                                                                                                      | 16.0 ± 1.4 (9.0 – 34.7)   | 12.2 ± 1.2 (6.5 – 19.5)   | 0.05*           |
| ETS Rotenone Insensitive                                                                                                                                                                                                                                                                                                                                                                                                                    | 7.7 ± 0.5 (4.4 – 11.5)    | 6.0 ± 0.8 (2.6 – 9.4)     | 0.08            |
| <b>Citrate Synthase Activity</b><br><b><i>(μmol · min<sup>-1</sup> · mg protein<sup>-1</sup>)</i></b>                                                                                                                                                                                                                                                                                                                                       | 1.11 ± 0.10 (0.72 – 1.84) | 0.98 ± 0.09 (0.46 – 1.47) | 0.33            |
| <p><sup>1</sup>Summary of all measurements obtained from respirometry of permeabilized muscle fibers with and without fatty acids and citrate synthase activity. Values are presented as mean ± SEM (range), <i>n</i> = 11 per group. Differences between groups were evaluated by unpaired two-tailed Student's t-tests and <i>P</i>-values are shown.</p> <p>* Represents significant difference between groups with <i>P</i> ≤ 0.05.</p> |                           |                           |                 |

Supplementary Data

**Supplemental Table 5. Correlations between carbohydrate metabolism phenotypes and respirometry of permeabilized muscle fibers of all female cynomolgus macaques in the study<sup>1</sup>**

|                                        | FAO   | FAO + Complex I | FAO + Complex I + II | FAO Max ETS Capacity | FAO ETS Rot Sensitive | FAO ETS Rot Insensitive | Complex I | Complex I + II | Max ETS Capacity | ETS Rot Sensitive | ETS Rot Insensitive |
|----------------------------------------|-------|-----------------|----------------------|----------------------|-----------------------|-------------------------|-----------|----------------|------------------|-------------------|---------------------|
| <b><i>Pearson</i></b>                  |       |                 |                      |                      |                       |                         |           |                |                  |                   |                     |
| HOMA-IR                                | 0.47* | 0.56**          | 0.59**               | 0.57**               | 0.32                  | 0.60**                  | 0.06      | 0.02           | 0.14             | 0.27              | -0.18               |
| Fasting Blood Glucose                  | 0.08  | -0.17           | -0.13                | 0.08                 | 0.09                  | -0.08                   | -0.06     | -0.11          | 0.03             | 0.09              | -0.11               |
| Fasting Blood Insulin                  | 0.30  | 0.40            | 0.44*                | 0.40                 | 0.23                  | 0.46*                   | 0.03      | -0.03          | 0.13             | 0.27              | -0.19               |
| Glucose AUC                            | 0.18  | 0.07            | 0.10                 | 0.10                 | 0.06                  | 0.06                    | -0.27     | -0.18          | -0.02            | 0.06              | -0.17               |
| Insulin AUC                            | 0.27  | 0.41            | 0.44*                | 0.29                 | 0.26                  | 0.34                    | -0.11     | 0.03           | -0.12            | -0.10             | -0.11               |
| <b><i>Partial for Age + Weight</i></b> |       |                 |                      |                      |                       |                         |           |                |                  |                   |                     |
| HOMA-IR                                | 0.48* | 0.58**          | 0.61**               | 0.57**               | 0.27**                | 0.67**                  | 0.05      | -0.01          | 0.12             | 0.26              | -0.20               |
| Fasting Blood Glucose                  | 0.12  | -0.17           | -0.09                | 0.09                 | 0.11                  | -0.06                   | -0.17     | -0.19          | -0.05            | 0.02              | -0.18               |
| Fasting Blood Insulin                  | 0.30  | 0.41            | 0.44                 | 0.39                 | 0.39                  | 0.50*                   | 0.01      | -0.05          | 0.11             | 0.25              | -0.20               |
| Glucose AUC                            | 0.11  | -0.02           | -0.01                | 0.07                 | 0.07                  | 0.04                    | -0.10     | -0.11          | 0.14             | 0.25              | -0.13               |
| Insulin AUC                            | 0.26  | 0.48*           | 0.48*                | 0.36                 | 0.36                  | 0.44                    | 0.14      | 0.20           | 0.02             | 0.05              | -0.03               |

<sup>1</sup>Values are Pearson correlation coefficients (*R*) for relationships between measures of carbohydrate metabolism and measures of respiration of permeabilized skeletal muscle fibers. Partial correlations were controlled for age and weight at time of necropsy.

\* Represents significant correlation with  $P \leq 0.05$

\*\* Represents significant correlation with  $P \leq 0.01$

**Supplemental Figure 1. Mean energy intake of female cynomolgus macaques fed either a Western or Mediterranean diet for 30 months**

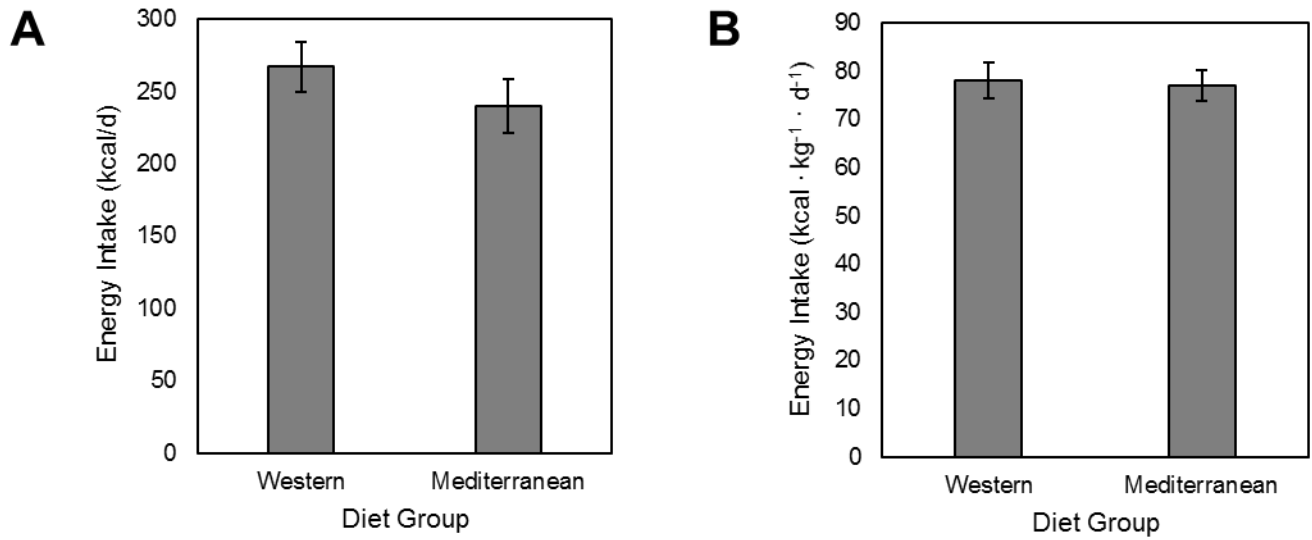

(A) Mean calories consumed per day by diet group. Data are presented as means  $\pm$  SEM,  $n = 11$ .

(B) Mean calories consumed per kilogram of body weight per day by diet group. Data are presented as means  $\pm$  SEM,  $n = 11$ .

**Supplemental Figure 2. Related to Figure 3. Correlations between female cynomolgus macaque permeabilized muscle fiber bioenergetics and fasting blood insulin and insulin area under the curve**

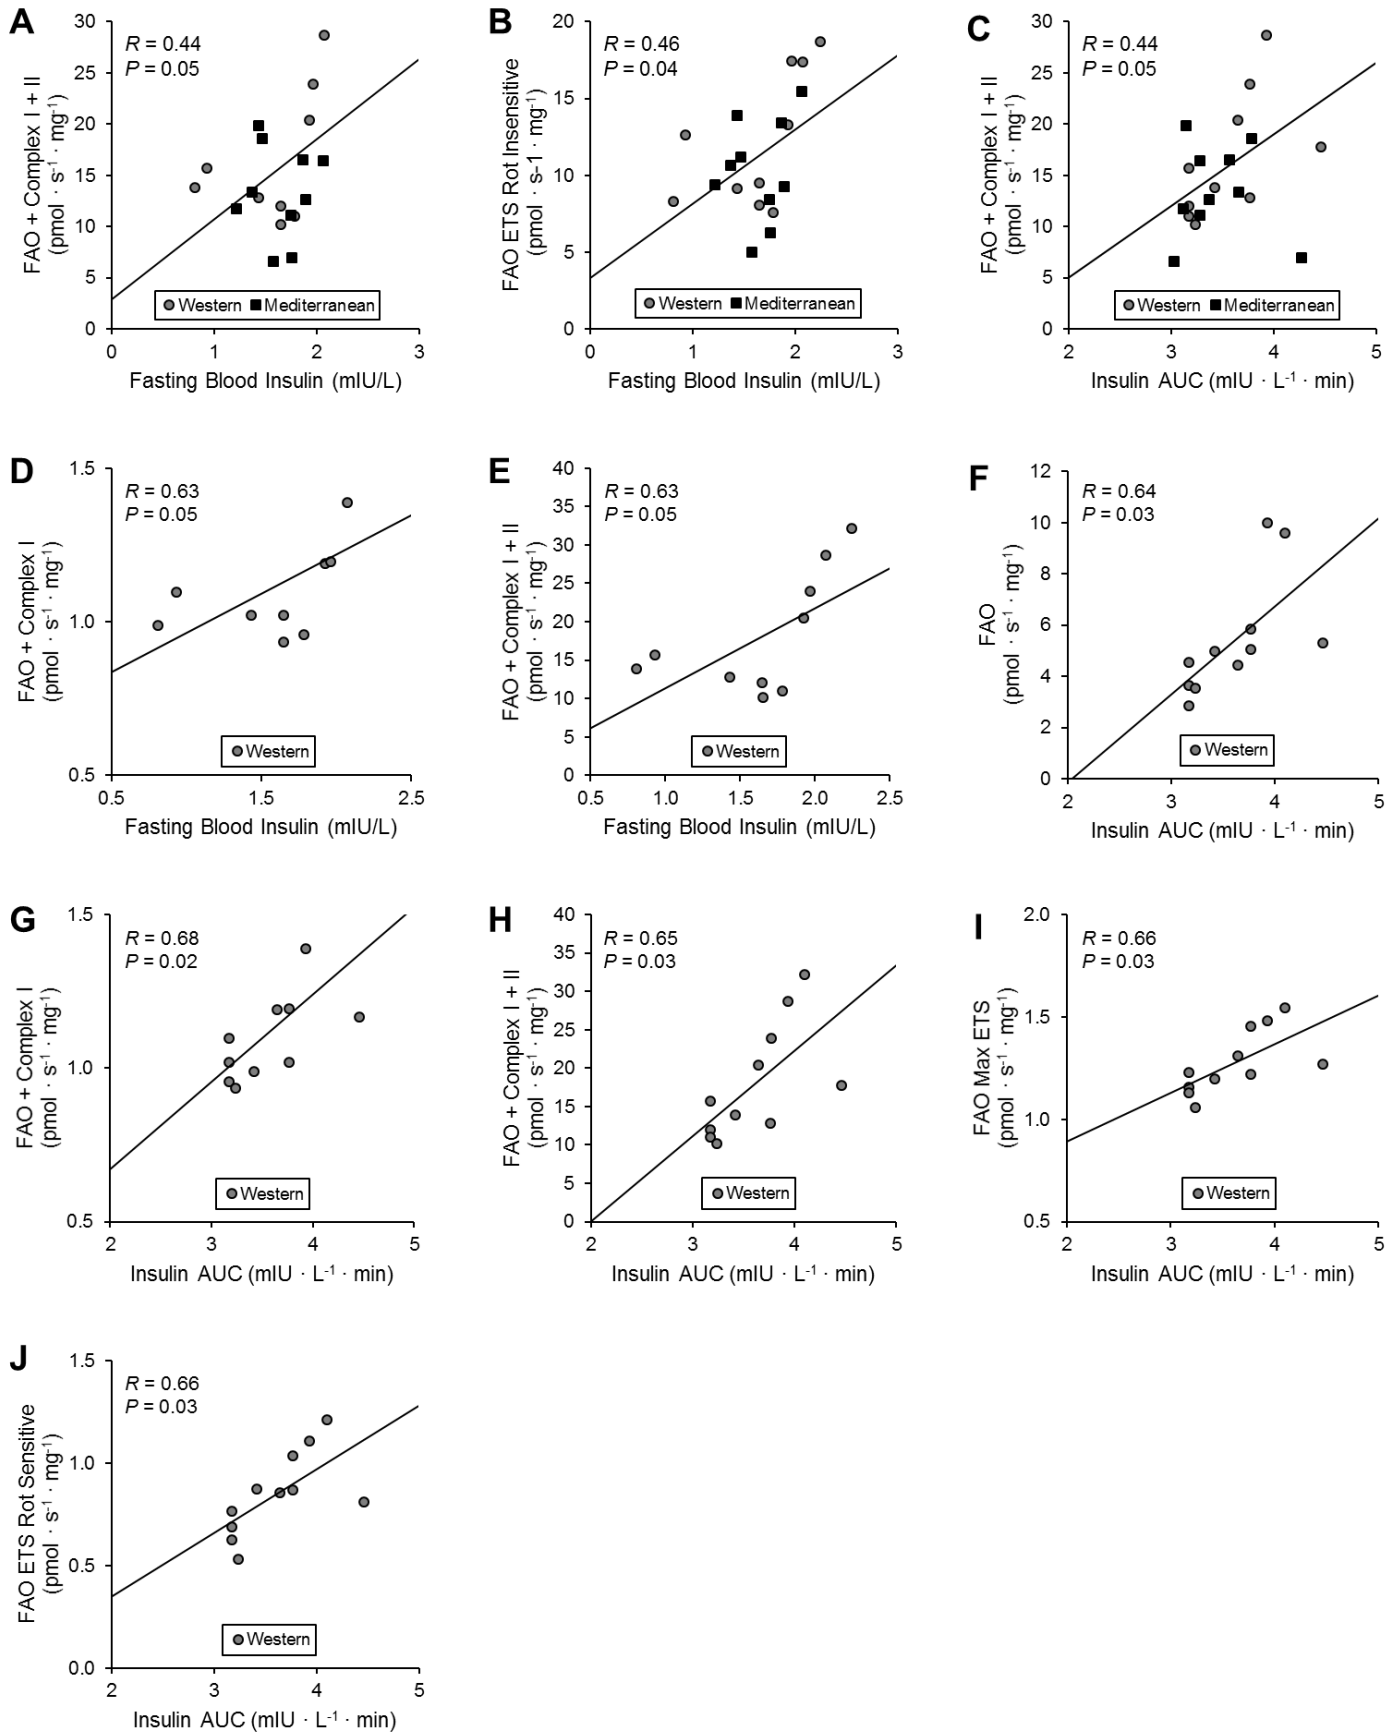

## Supplementary Data

(A-B) Plots of fatty acid oxidation measures versus fasting blood insulin for all animals in the study. Pearson correlation ( $R$ ) and  $P$ -values are shown on each plot.

(C) Plot of FAO + Complex I + II respiration versus insulin area under the curve for all animals in the study. Pearson correlation ( $R$ ) and  $P$ -value are shown on the plot.

(D-E) Plots of fatty acid oxidation measures versus fasting blood insulin for animals in the Western diet group. Pearson correlation ( $R$ ) and  $P$ -values are shown on each plot.

(F-J) Plots of fatty acid oxidation measures versus insulin area under the curve for animals in the Western diet group. Pearson correlation ( $R$ ) and  $P$ -values are shown on each plot.



**Supplemental Figure 3. Flux control ratios and Western blot analysis of skeletal muscle from female cynomolgus macaques fed a Western or Mediterranean diet**

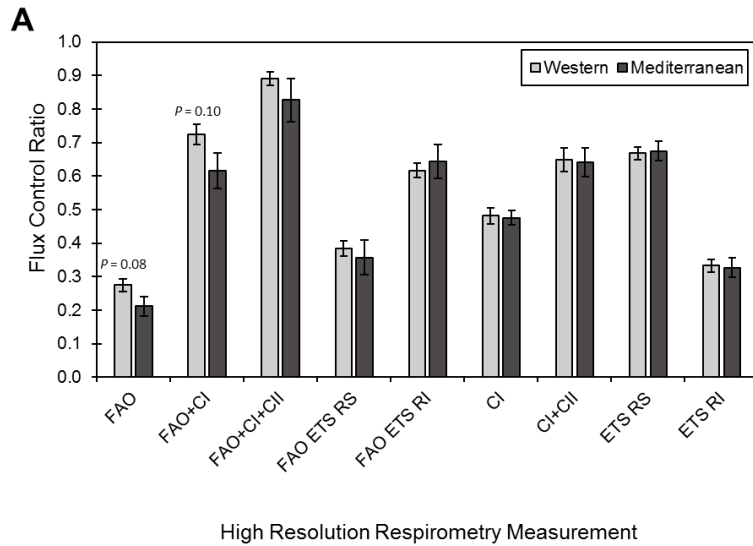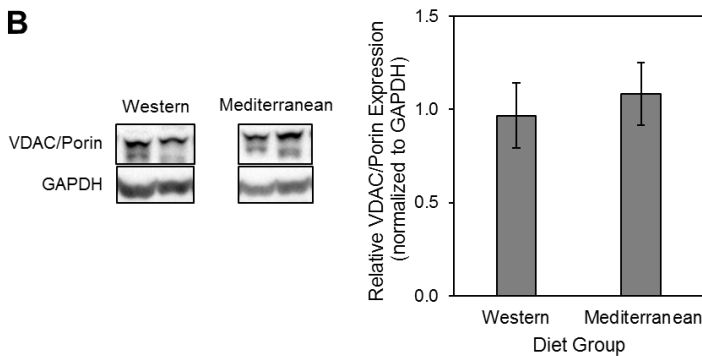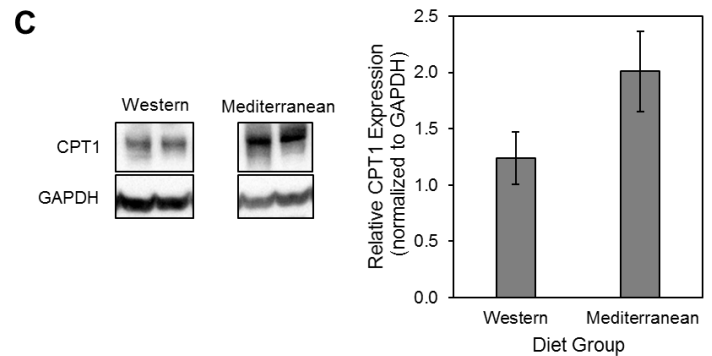

(A) Flux control ratios (FCRs) of high-resolution respirometry of permeabilized skeletal muscle fibers. FCRs were calculated by dividing each respiration parameter by maximum respiration to examine differences in relative contributions of substrates to mitochondrial respiration. Data are presented as means  $\pm$  SEM,  $n = 11$ .

(B) Protein expression of VDAC/Porin in skeletal muscle tissue homogenate from cynomolgus macaques fed either a Western or Mediterranean diet. Data are presented as means  $\pm$  SEM,  $n = 11$ .

(C) Protein expression of CPT1 in skeletal muscle tissue homogenate from cynomolgus macaques fed either a Western or Mediterranean diet. Data are presented as means  $\pm$  SEM,  $n = 11$ .
